# Supplementary material for: Non-Invasive Technology That Improves Cardiac Function after Experimental Myocardial Infarction: Whole Body Periodic Acceleration (pGz)
Source: PubMed Central journal article supplement (PMC4373845; doi:10.1371/journal.pone.0121069), 2015-03-25
Supplement: pone.0121069.s001.pdf [file pone.0121069.s001.pdf]

# **Non-Invasive Technology that Improves Cardiac Function after Experimental Myocardial Infarction: Whole Body Periodic Acceleration (pGz)**

## **Supporting Information**

Arkady Uryash <sup>1¶</sup>, Jorge Bassuk <sup>1¶†</sup>, Paul Kurlansky <sup>2&</sup>, Francisco Altamirano <sup>3&</sup>,

Jose R. Lopez<sup>3&</sup>, Jose A. Adams <sup>1¶\*</sup>

<sup>1</sup> Division of Neonatology, Mount Sinai Medical Center, Miami Beach, FL

<sup>2</sup> Columbia Heart Source, Columbia University College of Physicians and Surgeons,

New York, NY

<sup>3</sup> Departments of Molecular Bioscience, School of Veterinary Medicine, University of California Davis, CA

Corresponding author

E-mail: [tony-adams@msmc.com](mailto:tony-adams@msmc.com)

¶ These authors contributed equally to this work.

& These authors also contributed equally to this work.

† Deceased

## Animal Care Survival Surgery Post Op Assessment & Scoring

|                                                    |                  | Protocol Number  |                  |                  |                  |                  |                  |
|----------------------------------------------------|------------------|------------------|------------------|------------------|------------------|------------------|------------------|
| <i>Study Date</i>                                  |                  |                  |                  |                  |                  |                  |                  |
| <i>WEIGHT</i>                                      |                  |                  |                  |                  |                  |                  |                  |
|                                                    | <i>Date/Time</i> | <i>Date/Time</i> | <i>Date/Time</i> | <i>Date/Time</i> | <i>Date/Time</i> | <i>Date/Time</i> | <i>Date/Time</i> |
| <b>Observation</b>                                 |                  |                  |                  |                  |                  |                  |                  |
| <i>Inactive</i>                                    |                  |                  |                  |                  |                  |                  |                  |
| <i>Walking on Tiptoe</i>                           |                  |                  |                  |                  |                  |                  |                  |
| <i>Hunched posture</i>                             |                  |                  |                  |                  |                  |                  |                  |
| <i>Sunken Eyes</i>                                 |                  |                  |                  |                  |                  |                  |                  |
| <i>Ruffled Coat</i>                                |                  |                  |                  |                  |                  |                  |                  |
| <i>Stool<sup>a</sup></i>                           |                  |                  |                  |                  |                  |                  |                  |
|                                                    |                  |                  |                  |                  |                  |                  |                  |
| <b>Handling</b>                                    |                  |                  |                  |                  |                  |                  |                  |
| <i>Not Alert</i>                                   |                  |                  |                  |                  |                  |                  |                  |
| <i>Not Eating</i>                                  |                  |                  |                  |                  |                  |                  |                  |
| <i>Aggressive</i>                                  |                  |                  |                  |                  |                  |                  |                  |
|                                                    |                  |                  |                  |                  |                  |                  |                  |
| <i>Respirations<sup>b</sup></i>                    |                  |                  |                  |                  |                  |                  |                  |
|                                                    |                  |                  |                  |                  |                  |                  |                  |
| <i>Body Weight(gms)</i>                            |                  |                  |                  |                  |                  |                  |                  |
| <i>% Change</i>                                    |                  |                  |                  |                  |                  |                  |                  |
|                                                    |                  |                  |                  |                  |                  |                  |                  |
| <i>Body Temp (°C) (if &lt;35°C active warming)</i> |                  |                  |                  |                  |                  |                  |                  |
| <i>Overall Condition<sup>c</sup></i>               |                  |                  |                  |                  |                  |                  |                  |
| <i>Surgical Site:<sup>d</sup></i>                  |                  |                  |                  |                  |                  |                  |                  |
| <i>Comment:</i>                                    |                  |                  |                  |                  |                  |                  |                  |
| <i>Initials</i>                                    |                  |                  |                  |                  |                  |                  |                  |

**Score Details:**

<sup>a</sup>Stool: 0=normal 1= loose 2= pools 3=mucus 4= blood

<sup>b</sup>Respirations: R=rapid S=Shallow L=Labored N=Normal

<sup>c</sup>Overall Condition: 0=Normal to 4= emaciated

<sup>d</sup>Surgical Site: 0=clean and normal 2=crusting no pus 3=redness and pus

## Acute Pain Assessment in Rats Post Surgery

|                                        | Yes | No |
|----------------------------------------|-----|----|
| Rubbing or Scratching Surgical Site    |     |    |
| Piloerection                           |     |    |
| Decreased Grooming                     |     |    |
| Arching Back                           |     |    |
| Falling or Staggering                  |     |    |
| Restlessness or Aggressive             |     |    |
|                                        |     |    |
| Increased Respirations                 |     |    |
| Reduced Level of Activity              |     |    |
| Porphyrin discharge (eyes or nostrils) |     |    |
| Vocalization                           |     |    |
